# Supplementary material for: Hierarchical attention graph learning with LLM enhancement for molecular solubility prediction
Source: Royal Society of Chemistry journal article supplement (doi:10.1039/d5dd00407a), 2025-12-15
Supplement: d5dd00407a1.pdf [file d5dd00407a1.pdf]

Cite this: DOI: 00.0000/xxxxxxxxxx

## Hierarchical Attention Graph Learning with LLMs Enhancement for Molecular Solubility Prediction

Yangxin Fan,<sup>a</sup> Yinghui Wu,<sup>a</sup> Roger H. French,<sup>b</sup> Danny Perez,<sup>c</sup> Michael G. Taylor,<sup>c</sup> and Ping Yang,<sup>c\*</sup>

Received Date  
Accepted Date

DOI: 00.0000/xxxxxxxxxx

### 1 Supplementary Information

#### 1.1 Proof

**Theorem 1.1.** *The complexity of HASolGNN is  $O(ek|E|dF^2 + ek|V|F^2)$ , where  $e$ ,  $k$ ,  $|E|$ ,  $|V|$ ,  $F$ , and  $d$  denotes the number of training epochs, the number of iterations in AE Block,  $\max(|E_1|, |E_2|)$ ,  $\max(|V_1|, |V_2|)$ , number of features per node, and maximum degree of solute graph  $G_1$  and solvent graph  $G_2$ .*

*Proof.* We prove above by first demonstrating that the following two arguments hold: (1) GAT component in the AE Block asymptotically dominates over its counterparts in the ME Block and IE Block; and (2) for all embedding blocks, the GAT component asymptotically dominates over the LSTM component. For (1), AE Block operates directly on molecular graphs  $\hat{G}$  while ME Block operators on synthetic graph  $\hat{G}^M$  and IG operators on the interaction graph  $IG$ . Since the size of molecular graph is  $|\hat{G}| = |V| + |E|$ , the size of synthetic graph is  $|\hat{G}^M| = 2|V| + 1$ , and the size of interaction graph  $|IG|$  is a constant, both  $|\hat{G}^M|$  and  $|IG|$  are bounded by  $|\hat{G}|$ . Hence, GAT component in the AE Block asymptotically dominates over its counterparts in the ME Block and IE Block. For (2), within each embedding block, each GAT is followed by a LSTM layer as illustrated in Fig. ?? . Assume the embedding block operators on computation graph  $G = (V, E)$ , each LSTM performs gates computation (four gates) which is  $O(|V|F^2)$  and element wise operator is  $O(|V|F)$ . This cost of LSTM is  $O(|V|F^2)$ . The cost of a single GAT layer is  $O(|E|dF^2 + |V|F^2)$ <sup>1</sup>. This means that within each embedding block, the GAT component asymptotically dominates over the LSTM component. Besides, one can easily verify that the complexity of the fusion mechanism is  $O(F^2)$ . The inference complexity of GAT is bounded by one training iteration. Therefore,

the training complexity of HASolGNN is  $O(ek|E|dF^2 + ek|V|F^2)$  and the inference complexity is  $O(k|E|dF^2 + k|V|F^2)$ .

#### 1.2 Para-HASolGNN

The design of HASolGNN is parallel-friendly<sup>2</sup>. We introduce a parallel algorithm for HASolGNN training, denoted as Para-HASolGNN, illustrated in Fig. 1, to scale the training of HASolGNN to large-scale solubility dataset. Para-HASolGNN exploits the following three levels of parallelism. We assume the followings: (1) the main coordinator  $P_0$  has the access to all Level I coordinators  $P_i$ ; and (2) each  $P_i$  has information access to all level II workers  $P_{i,j}$ .

Level I: Model Parallelism. HASolGNN contains two parallel MFGM modules. This presents opportunities for parallelizing the training by distributing solute and solvent MFGM among the processors. In each epoch, Para-HASolGNN executes model parallelism where  $P_i$  initializes parallel jobs  $J_i$ ,  $\forall i \in [1, 2]$ . Within each the level I execution, it forward propagates  $MFGM_i$  using  $\Phi_i$ . At each  $P_i$ ,  $MFGM_i$  backpropagates independently and updates their gradients in parallel after receiving messages from  $P_0$ . The output of each module will be assembled and forwarded to  $IG \in M$  by the coordinator processor  $P_0$ .  $P_0$  calculates global loss in Eqn. ?? and updates  $IG$ .

Level II: Data Parallelism. Within the solute or solvent MFGM, Para-HASolGNN takes a sequence of molecular graphs as the input. At the level II, Para-HASolGNN initializes the level II parallel jobs  $J_i^j, \forall j \in [1, \lceil \frac{T}{L} \rceil]$  and processes the components of the input with a fixed batch size  $L$  in parallel. The batch size is determined by available computational resources and the total workload. Besides, Para-HASolGNN optionally exploits the mini-batch data parallelism<sup>3</sup> to achieve even larger speed-up. It splits the information propagation of the large-scale molecular graph into parallelly computed message flow graphs induced by mutually disjoint node batches.

Level III: Pipeline Parallelism. Each MFGM comprises two ME

<sup>a</sup> Department of Computer Science, Case Western Reserve University, Cleveland, OH, USA, E-mail: yxf451@case.edu; yxw1650@case.edu.

<sup>b</sup> Department of Material Science, Case Western Reserve University, Cleveland, OH, USA, E-mail: rxf131@case.edu.

<sup>c</sup> Theoretical Division, Los Alamos National Laboratory, Los Alamos, NM, USA, E-mail: danny\_perez@lanl.gov; mgt16@lanl.gov; pyang@lanl.gov.

---

**Algorithm 1** : Para-HASolGNN

---

```
1: Input: A batch of solute and solvent graph pairs  $\Phi = \{(G_1^1, G_2^1), \dots, (G_1^T, G_2^T)\}$ , a randomly initialized HASolGNN Model  $M$ , batch size  $L$ , a coordinator  $P_0$ , a set of sub-coordinators  $P_i$ , a set of workers  $P_{i,j}$ , the number of epochs  $e$ ;  
2: Output: Incrementally trained  $M$  upon batch  $\Phi$ .  
3: for  $m = 1$  to  $e$  do  
4:   /* executes model parallelism */  
5:   Para_Model ( $J_i(MFGM_i, \Phi_i)$ ),  $\forall i \in [1, 2]$ ;  
6:    $P_0$ .forward( $IG$ );  
7:    $P_0$  updates  $IG \in M$ ;  
8: return  $M$  from  $P_0$ ;  
1: procedure PARA_MODEL( $J_i$ )  
2:   /* executes data parallelism */  
3:   Para_Data ( $J_i^j(MFGM_i^j, \Phi_i^j)$ ),  $\forall j \in [1, \lceil \frac{T}{L} \rceil]$ ;  
4:    $P_i$  receives  $M_i$  from  $P_0$ ;  
5:    $P_i$  updates  $MFGM_i \in M$ ;  
1: procedure PARA_DATA( $J_i^j$ )  
2:   /* executes pipeline parallelism (lines 4-5) */  
3:    $B_1$ .forward( $\Phi_i^j$ ),  $B_1 \in MFGM_{i,j}$ ;  
4:    $B_2$ .forward( $\Phi_i^j$ ),  $B_2 \in MFGM_{i,j}$ ;  
5:    $P_{i,j}$  receives  $M_{i,j}$  from  $P_i$ ;  
6:    $P_{i,j}$  updates  $MFGM_{i,j}$ ;
```

---

Fig. 1 Para-HASolGNN: Three-level Parallel Training.

Blocks and one AE Block. We adopt an asynchronous macro-pipeline parallelism schema<sup>4</sup> to parallelize the computation of the two independent branches  $B_1$  and  $B_2$ .  $B_1$  consists of a AE Block followed by a ME Block while  $B_2$  comprises a single ME Block. In this way, the forward message passing of both  $B_1$  and  $B_2$  are parallelly computed. It eliminates the inter-pipeline synchronization (w/o information loss since the batches from level II are independent of each other).

**Complexity Analysis of Para-HASolGNN.** The total cost of Para-HASolGNN is  $O\left(\frac{ek|E|dF^2 + ek|V|F^2}{|P|} + f(\theta)\right)$ . Given the input  $\Phi$  and a model  $M$ , we denote the total training cost of HASolGNN using a single worker as  $T(\Phi, M)$  which is  $O(ek|E|dF^2 + ek|V|F^2)$ . We show that for each level of parallelism, the parallel cost is in inverse proportion to the number of the workers  $|P|$ . We denote the communication overhead among the coordinators and workers as  $f(\theta)$  which is  $O(\lceil \frac{T}{L} \rceil e)$ . Since  $L$  and  $e$  are hyper-parameters only relevant to the model  $M$ ,  $f(\theta)$  accounts for a communication overhead that is independent of the size of  $\Phi$  but only dependent of the selection of parameters of  $M$ . With the level I and II parallelisms, the communication cost can be further reduced to  $O(e)$ . Therefore, the total cost of Para-GTrend is  $O\left(\frac{ek|E|dF^2 + ek|V|F^2}{|P|} + f(\theta)\right)$ .  $f(\theta)$  is a linear function independent of size of  $\Phi$ .

### 1.3 Supplementary Experimental Results

#### Notes and references

- 1 M. Besta and T. Hoefler, *IEEE Transactions on Pattern Analysis and Machine Intelligence*, 2024.
- 2 Y. Fan, R. Wieser, L. S. Bruckman, R. H. French and Y. Wu, Proceedings of the 33rd ACM International Conference on Information and Knowledge Management, New York, NY, USA, 2024, p. 4470–4478.
- 3 D. Zheng, C. Ma, M. Wang, J. Zhou, Q. Su, X. Song, Q. Gan, Z. Zhang and G. Karypis, 2020 IEEE/ACM 10th Workshop on Irregular Applications: Architectures and Algorithms (IA3), 2020, pp. 36–44.
- 4 D. Narayanan, A. Harlap, A. Phanishayee, V. Seshadri, N. R. Devanur, G. R. Ganger, P. B. Gibbons and M. Zaharia, Proceedings of the 27th ACM Symposium on Operating Systems Principles, 2019, pp. 1–15.
